# Supplementary material
Source: Springer Nature journal article supplement (https://www.springermedizin.de/resource/supplementary/13643_2012_50_MOESM15_ESM.pdf/9681370)
Supplement: MOESM15 [file 9681370]

**Adaptation Activity-**  
targeting immigrant populations in terms of ethnicity

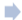

**Mechanism-**  
theorised as *'specificity'*

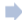

**Response-**  
immigrants sufficiently targeted to respond to ethnic diversity – 'shared ethnicity' and 'shared difference'

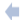

**Resistance** –  
stereotyping of ethnicity or loss of 'difference' implied by terms such as 'African', 'Asian' and 'Latino'

**Context**—balance ethnicity with other social factors including socioeconomic background, gender, and sexuality
